# Supplementary material for: An amino acid-based swift synthesis of zinc oxide nanostructures
Source: Royal Society of Chemistry journal article supplement (doi:10.1039/c3ra45914d), 2013-12-09
Supplement: c3ra45914d.pdf [file c3ra45914d.pdf]

## Supplementary Information

### An amino acid-based swift synthesis of zinc oxide nanostructures

Navaladian Subramanian and Amal Al Ghaferi\*

Institute Centre for Energy (iEnergy)  
Department of Mechanical and Materials Engineering  
Masdar Institute of Science and Technology (MIST)  
PO Box no. 54224, Abu Dhabi  
United Arab Emirates.

---

**Table S1** XRD Peaks Intensity Ratio of Zinc Oxide Samples

| ZnO sample (by synthesis conditions) |                          |                           | XRD peaks intensity ratio, $I_{(002)}/I_{(100)}$ |
|--------------------------------------|--------------------------|---------------------------|--------------------------------------------------|
| Temperature (°C)                     | [Zn <sup>2+</sup> ] (mM) | [lys]/[Zn <sup>2+</sup> ] |                                                  |
| 27                                   | 24                       | 2.25                      | 0.40                                             |
| 27                                   | 24 <sup>a</sup>          | 2.25                      | 0.60                                             |
| 27                                   | 24                       | 2.25 <sup>b</sup>         | 0.98                                             |
| 27 <sup>c</sup>                      | 24                       | 2.25                      | 0.56                                             |
| 27 <sup>c</sup>                      | 24 <sup>a</sup>          | 2.25                      | 0.60                                             |
| 27                                   | 8                        | 2.25                      | 0.31                                             |
| 27                                   | 16                       | 2.25                      | 0.37                                             |
| 27                                   | 32                       | 2.25                      | 0.50                                             |
| 70(ZnO-A)                            | 8                        | 2.25                      | 0.39                                             |
| 70(ZnO-B)                            | 24                       | 2.25                      | 0.44                                             |
| 70(ZnO-C)                            | 24                       | 2.25                      | 0.78                                             |

a-using zinc acetate; b-using NaOH; c- calcined at 400 °C in dynamic air atmosphere for 3 h

---

\* Corresponding author. Tel.: +971- 2- 810-9333; Fax: +971- 2- 810-9901; E-mail: aalghaferi@masdar.ac.ae
